# Supplementary material for: Detection and characterization of biogenic selenium nanoparticles in selenium-rich yeast by single particle ICPMS
Source: Royal Society of Chemistry journal article supplement (doi:10.1039/c7ja00378a), 2018-01-01
Supplement: c7ja00378a1.pdf [file c7ja00378a1.pdf]

1 **Supplementary Information**

2

3 **Detection and characterization of biogenic selenium**  
4 **nanoparticles in selenium-rich yeast by single particle ICPMS**

5

6 Javier Jiménez-Lamana <sup>a,\*</sup>, Isabel Abad-Álvaro <sup>b</sup>, Katarzyna Bierla <sup>a</sup>, Francisco Laborda <sup>b</sup>,  
7 Joanna Szpunar <sup>a</sup>, Ryszard Lobinski <sup>a</sup>

8

9 <sup>a</sup>Laboratoire de Chimie Analytique Bio-inorganique et Environnement (LCABIE), UMR 5254-  
10 IPREM, CNRS-UPPA, Hélioparc, Pau, France

11 <sup>b</sup>Group of Analytical Spectroscopy and Sensors (GEAS), Institute of Environmental Sciences,  
12 (IUCA) University of Zaragoza, Zaragoza, Spain

13

14 **Corresponding author**

15 \*Telephone: +33540175037. E-mail: [j.jimenez-lamana@univ-pau.fr](mailto:j.jimenez-lamana@univ-pau.fr)

16

17

18

19

20

21

22

23

24

25

26

27

28

29

30

31

32

33

34 **Table S1** Isotopic abundance and spectral interferences for Se isotopes

| Isotope          | Abundance (%) | Interference                                                                                                                                                                                                                                     |
|------------------|---------------|--------------------------------------------------------------------------------------------------------------------------------------------------------------------------------------------------------------------------------------------------|
| <sup>74</sup> Se | 0.89          | <sup>37</sup> Cl <sub>2</sub> <sup>+</sup> , <sup>38</sup> Ar <sup>36</sup> Ar <sup>+</sup> , <sup>38</sup> Ar <sup>36</sup> S <sup>+</sup> , <sup>40</sup> Ar <sup>34</sup> S <sup>+</sup> , <sup>74</sup> Ge <sup>+</sup>                      |
| <sup>76</sup> Se | 9.36          | <sup>40</sup> Ar <sup>36</sup> Ar <sup>+</sup> , <sup>38</sup> Ar <sup>38</sup> Ar <sup>+</sup> , <sup>40</sup> Ar <sup>36</sup> S <sup>+</sup> , <sup>76</sup> Ge <sup>+</sup> , <sup>39</sup> K <sup>37</sup> Cl <sup>+</sup>                  |
| <sup>77</sup> Se | 7.63          | <sup>40</sup> Ar <sup>36</sup> ArH <sup>+</sup> , <sup>40</sup> Ar <sup>37</sup> Cl <sup>+</sup> , <sup>38</sup> Ar <sub>2</sub> H <sup>+</sup> , <sup>41</sup> K <sup>36</sup> Ar <sup>+</sup> , <sup>42</sup> Ca <sup>35</sup> Cl <sup>+</sup> |
| <sup>78</sup> Se | 23.78         | <sup>40</sup> Ar <sup>38</sup> Ar <sup>+</sup> , <sup>78</sup> Kr <sup>+</sup> , <sup>38</sup> Ar <sup>40</sup> Ca <sup>+</sup> , <sup>64</sup> Zn <sup>14</sup> N <sup>+</sup> , <sup>44</sup> Ca <sup>34</sup> S <sup>+</sup>                  |
| <sup>80</sup> Se | 49.61         | <sup>40</sup> Ar <sub>2</sub> <sup>+</sup> , <sup>79</sup> BrH <sup>+</sup> , <sup>80</sup> Kr <sup>+</sup> , <sup>40</sup> Ar <sup>40</sup> Ca <sup>+</sup>                                                                                     |
| <sup>82</sup> Se | 8.73          | <sup>81</sup> BrH <sup>+</sup> , <sup>40</sup> Ar <sup>42</sup> Ca <sup>+</sup> , <sup>40</sup> Ar <sub>2</sub> H <sub>2</sub> <sup>+</sup> , <sup>82</sup> Kr <sup>+</sup> , <sup>12</sup> C <sup>35</sup> Cl <sub>2</sub> <sup>+</sup>         |

35

36

37

38

39

40

41

42

43

44

45

46

47

48

49

50

51

52

53

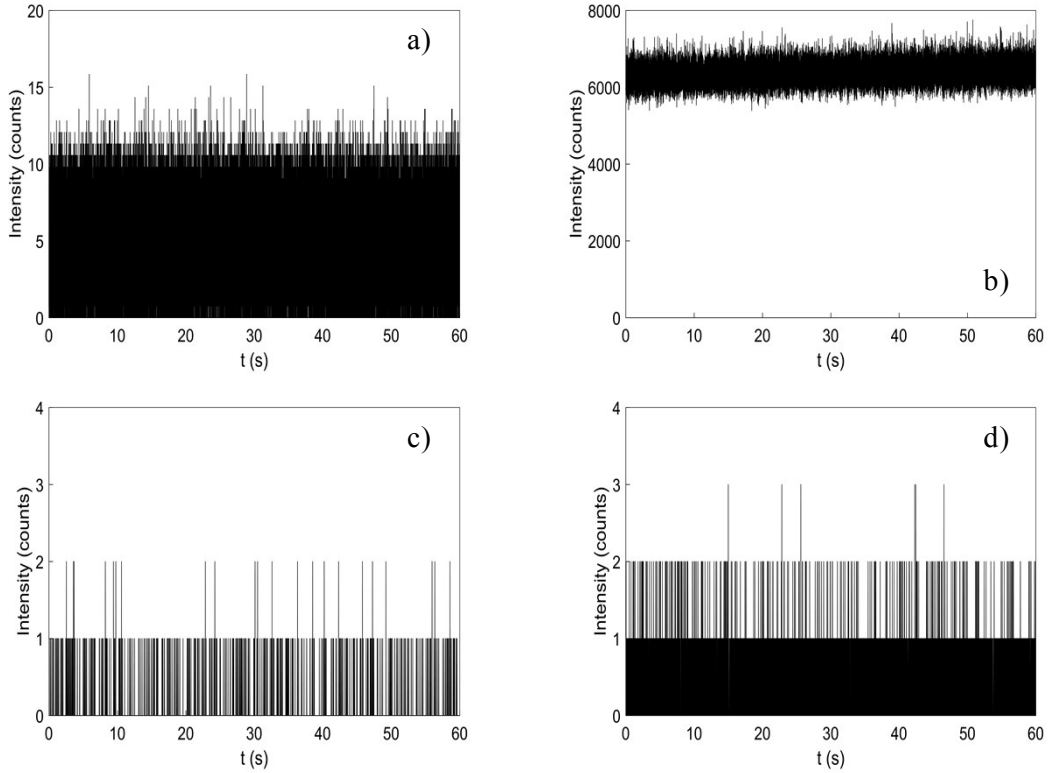

54 **Fig. S1** Time scans of ultrapure water monitoring (a)  $^{78}\text{Se}$  and (b)  $^{80}\text{Se}$  without reaction cell; (c)  $^{78}\text{Se}$   
 55 and (d)  $^{80}\text{Se}$  with reaction cell. Dwell time: 100  $\mu\text{s}$ .

56

57

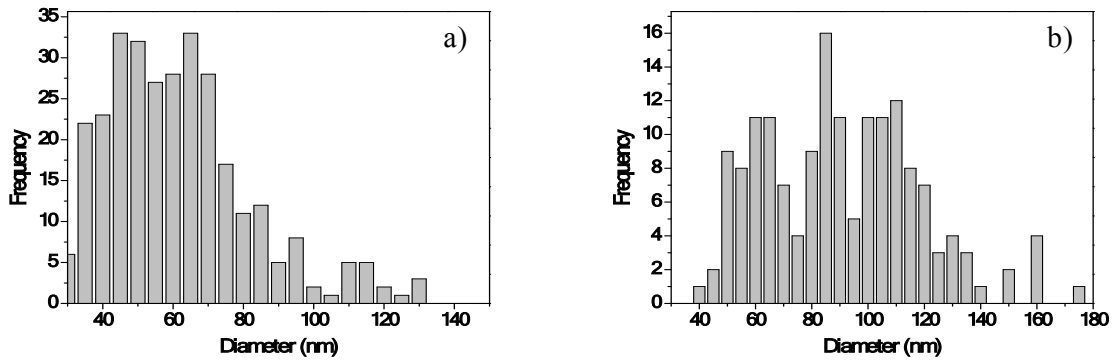

58 **Fig. S2** Size distributions obtained by TEM for a) 50-nm Se nanoparticle suspension; b) 100-nm Se.

59

60

61

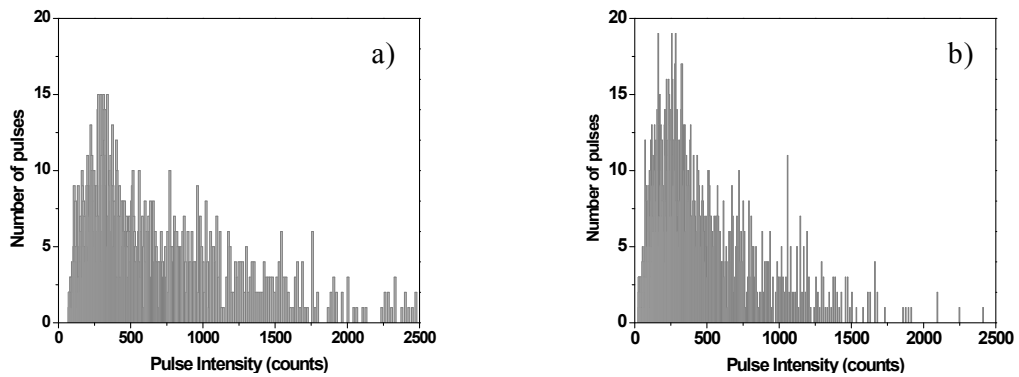

62 **Fig. S3** Signal distribution histograms corresponding to a) Sample A; b) Sample A post column.

63

64

65

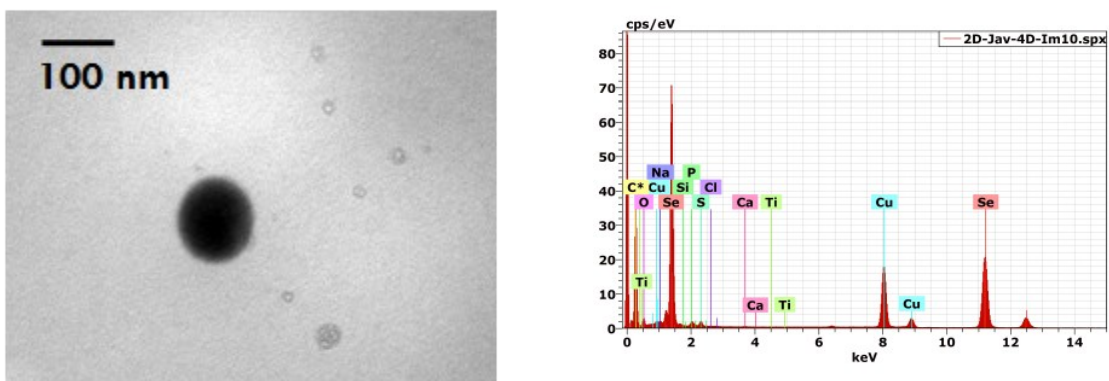

66 **Fig. S4** Transmission electron microscope image and EDS spectrum obtained for Sample A.

67
